# Supplementary material
Source: MDPI journal article supplement (https://www.mdpi.com/2571-9408/6/2/56)

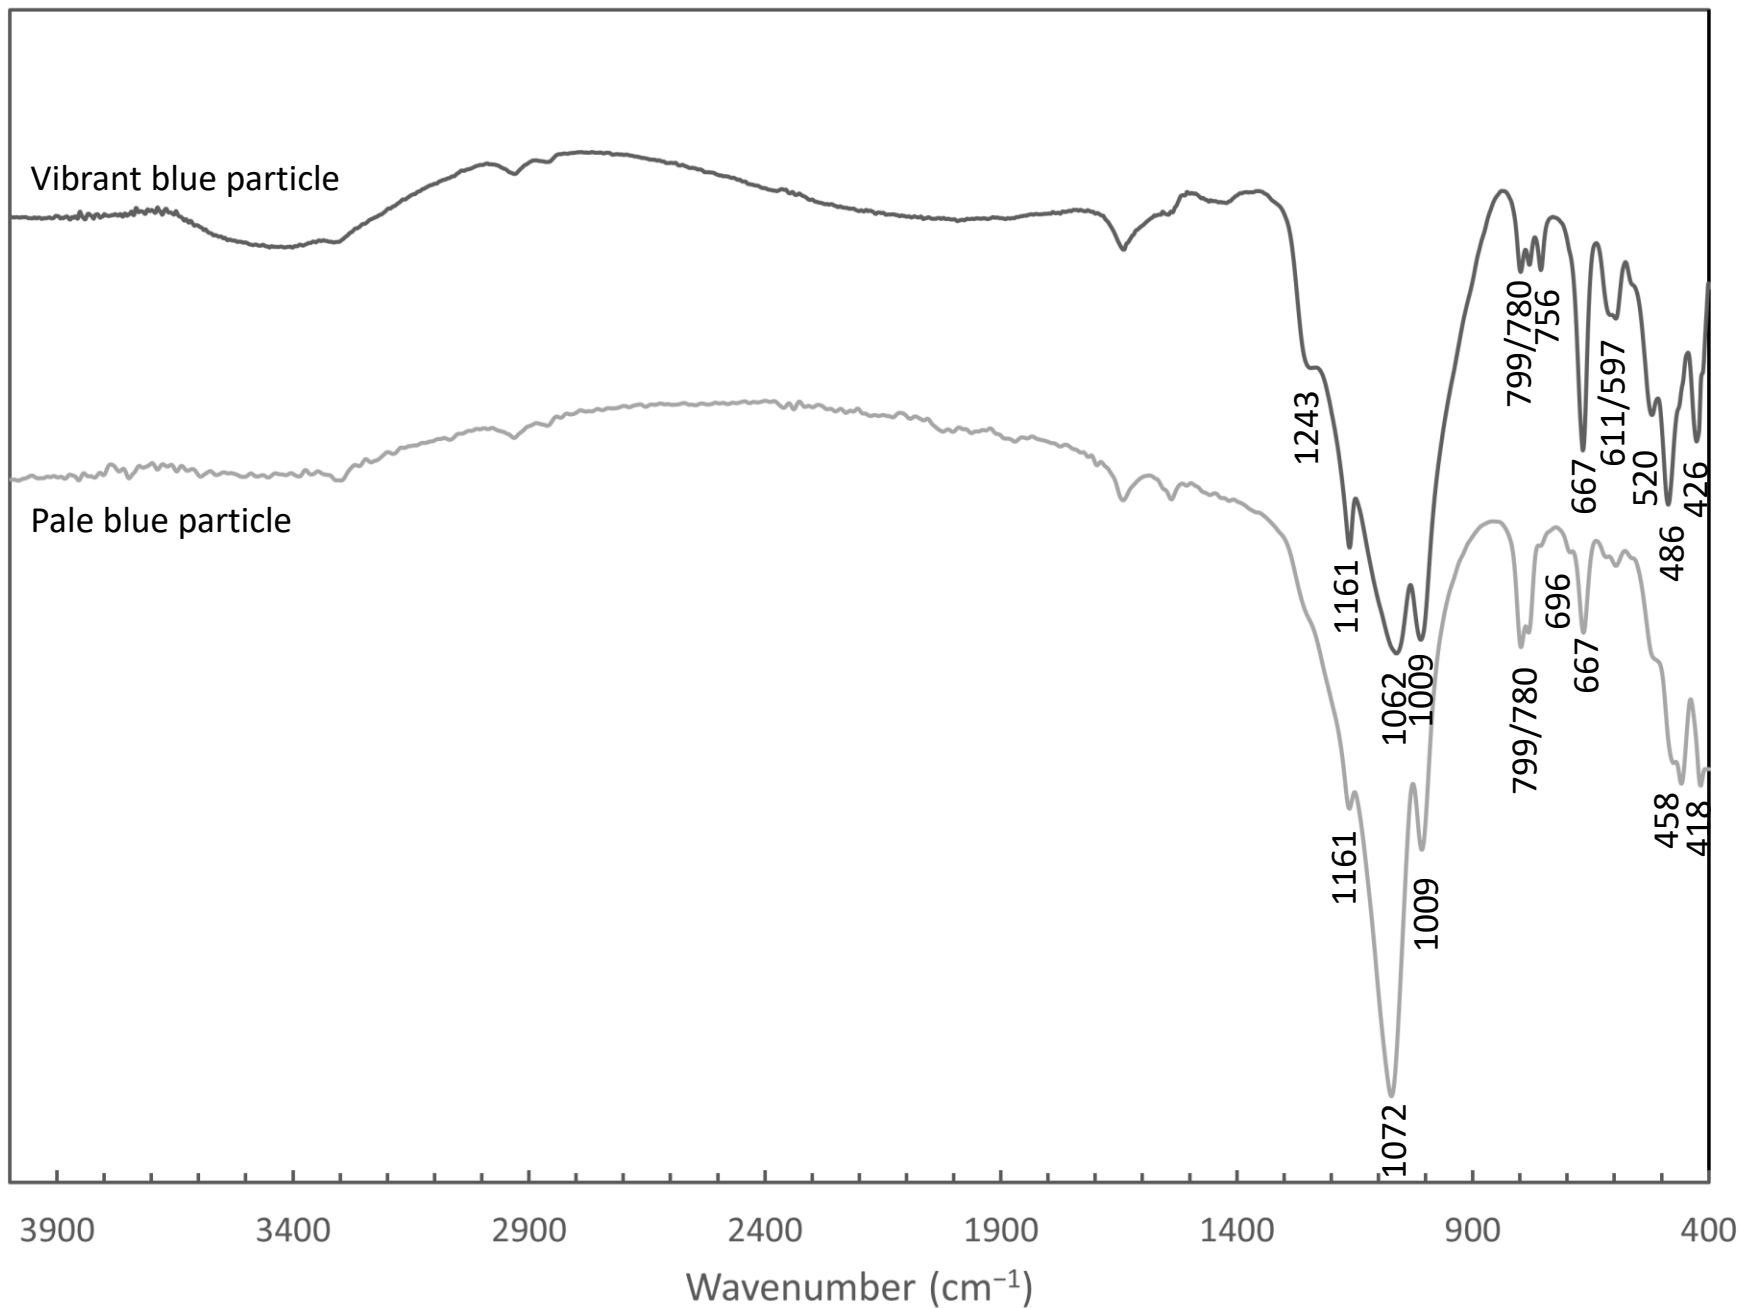

Supplement: s1 [file s1]
